# Supplementary material for: Synthesis and photophysical properties of novel phthalocyanine–perylenediimide–phthalocyanine triad and phthalocyanine–perylenediimide dyads
Source: Royal Society of Chemistry journal article supplement (doi:10.1039/c4ra03552f), 2014-01-01

## SUPPORTING INFORMATION

### **Synthesis and Photophysical Properties of Novel Phthalocyanine-Perylenediimide-Phthalocyanine Triad and Phthalocyanine- Perylenediimide Dyads**

**Xiaobo Sun,<sup>\*a</sup> Wenfeng Qiu,<sup>b</sup> Donghui Wei,<sup>c</sup> Mingsheng Tang<sup>c</sup> and Lin Guo<sup>\*a</sup>**

<sup>a</sup> School of Chemistry and Environment, Beihang University, Beijing 100191, P. R. China.

<sup>b</sup> Institute of Chemistry, Chinese Academy of Sciences, Beijing 100080, P. R. China,

<sup>c</sup> The College of Chemistry and Molecular Engineering, Zhengzhou University, Zhengzhou, Henan Province 450001, People's Republic of China.

### **CONTENTS**

**Figure S1** MALDI–TOF MS spectra of compound **4** with theoretically calculated pattern of isotopic distribution

**Figure S2** MALDI–TOF MS spectrum of compound **5**

**Figure S3** MALDI–TOF MS spectrum of compound **6**

**Figure S4** UV/Vis absorption spectrum of compounds **7** in CHCl<sub>3</sub> at room temperature.

**Figure S5** UV/Vis absorption spectrum of compounds **8** in CHCl<sub>3</sub> at room temperature.

**Fig. S1** MALDI-TOF MS spectra of compound **4**

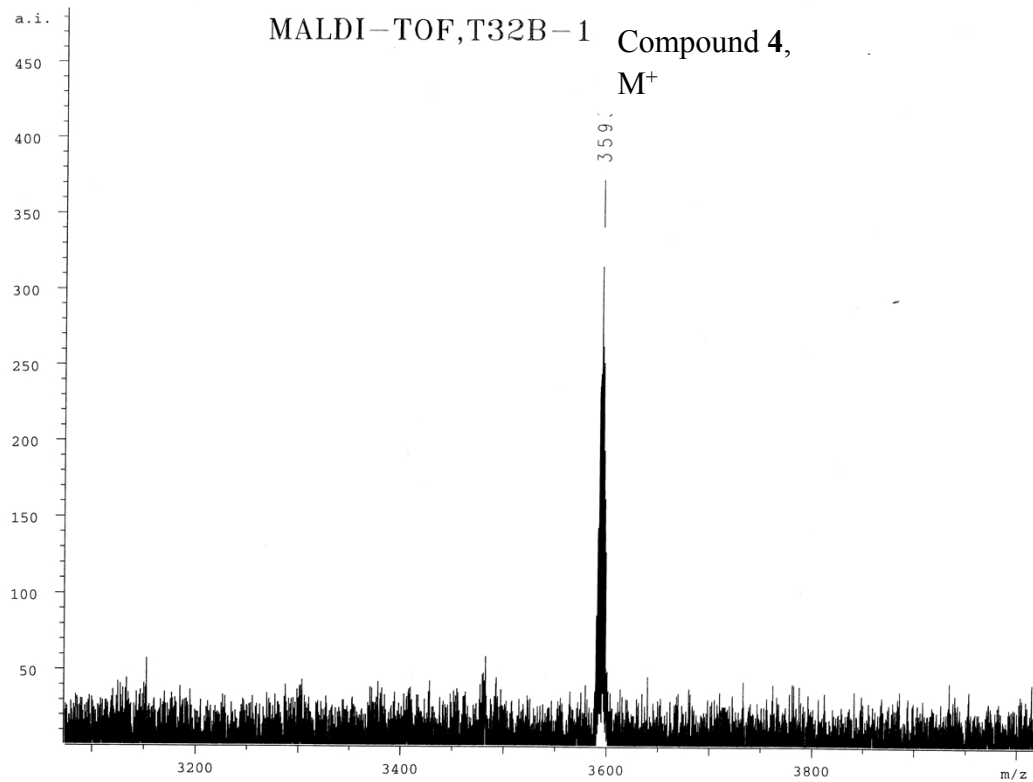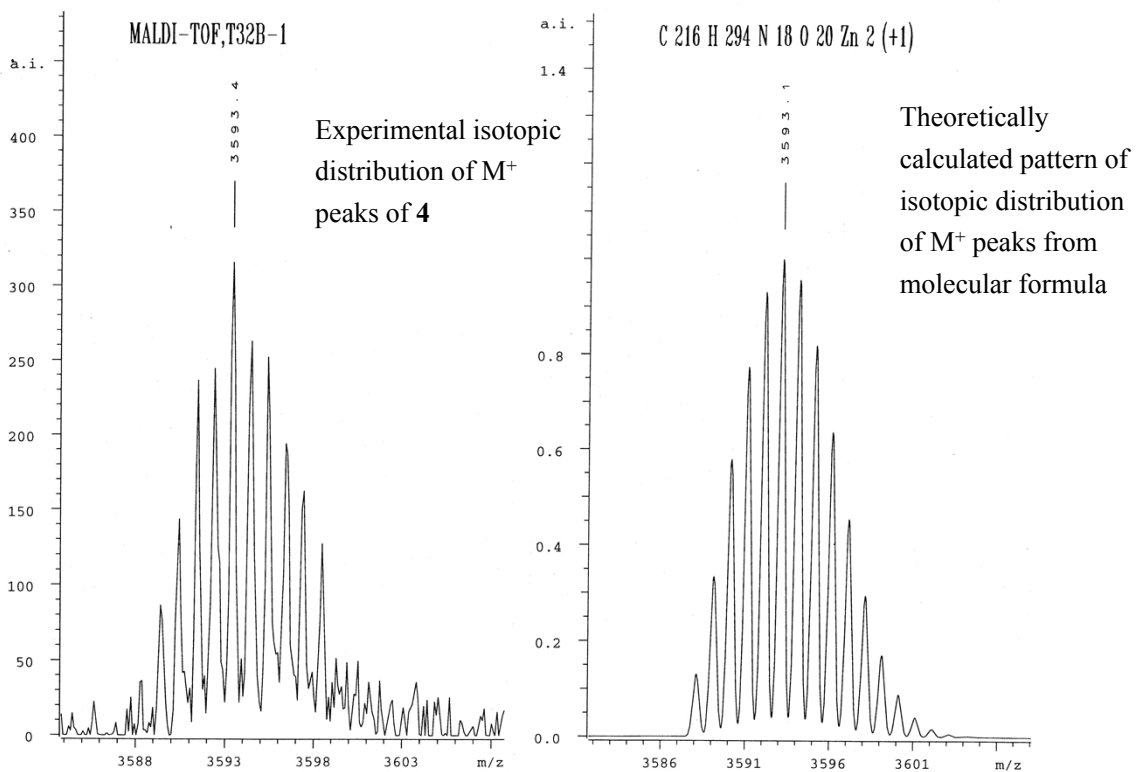

**Fig. S2** MALDI-TOF MS spectra of compound **5**

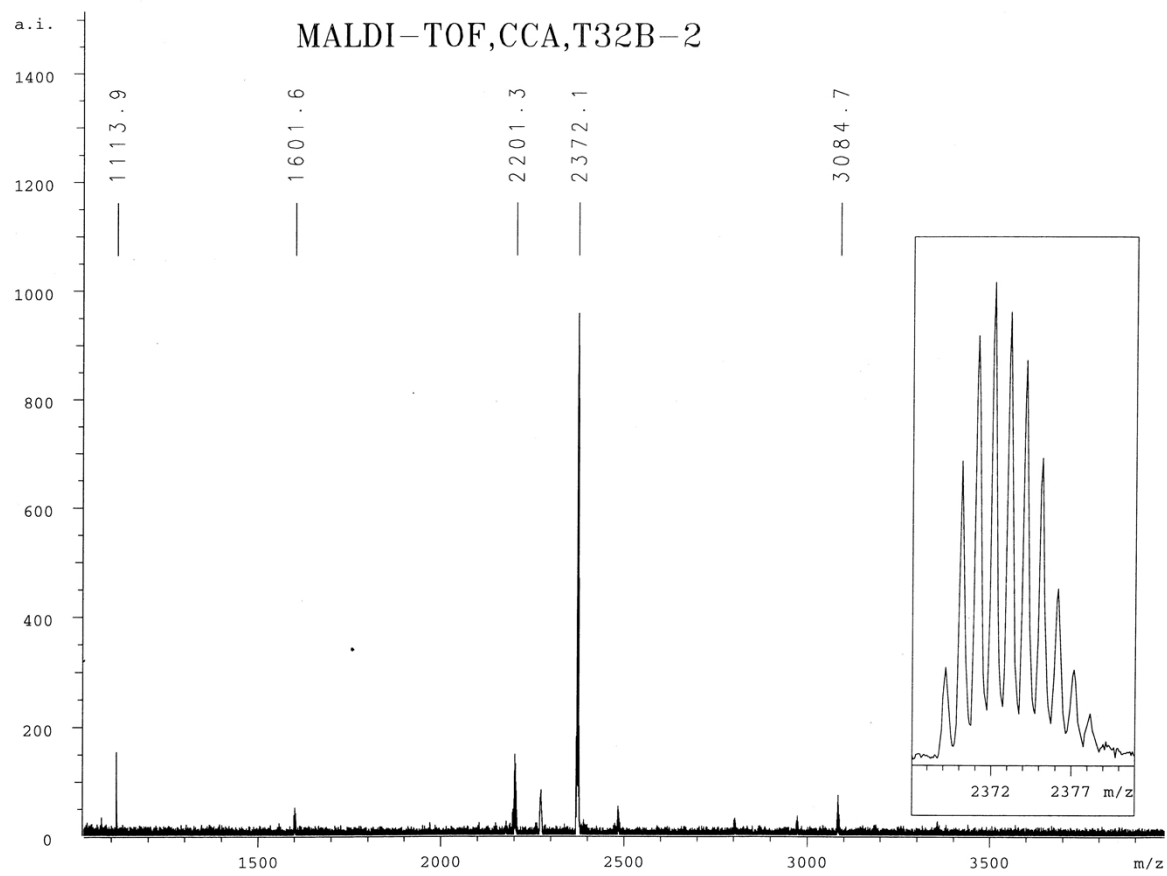

**Fig. S3** MALDI-TOF MS spectra of compound **6**

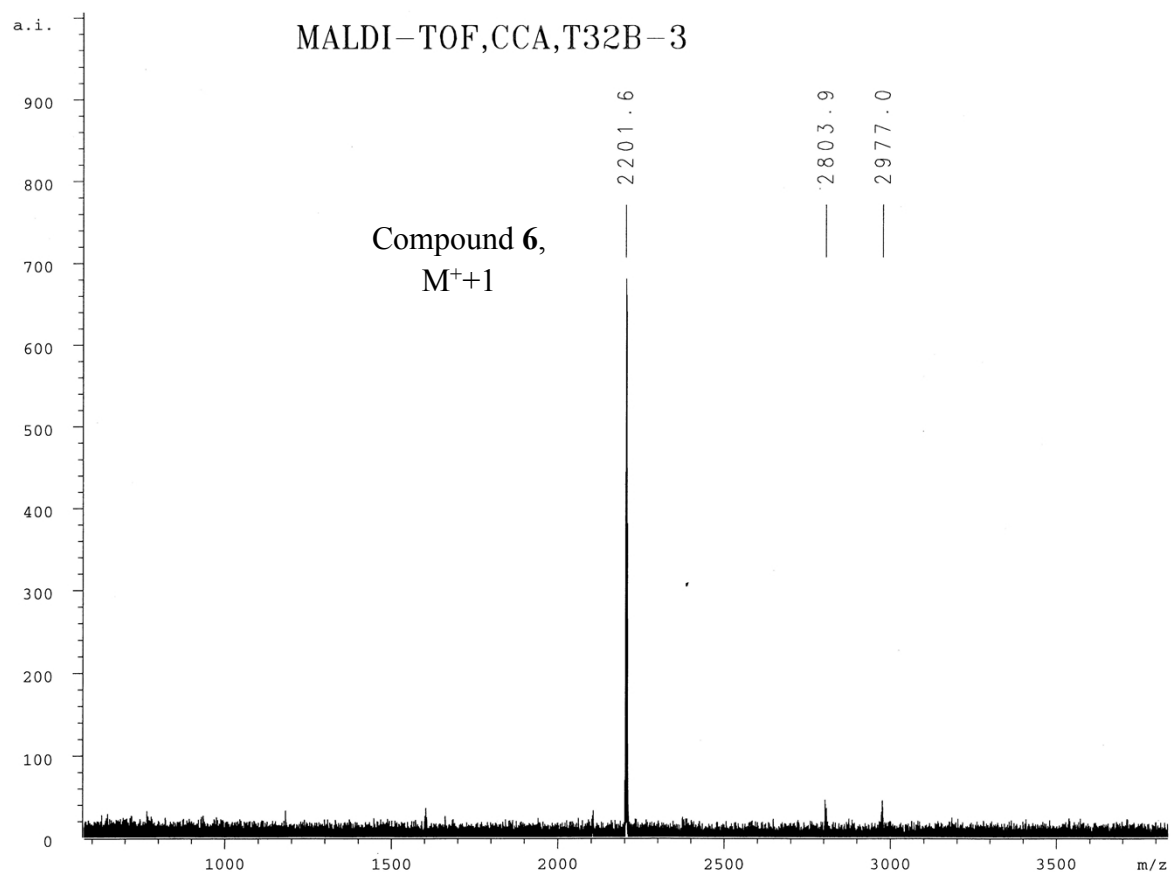

**Fig. S4** UV-vis absorption spectrum of compound **7** in  $\text{CHCl}_3$  at room temperature.

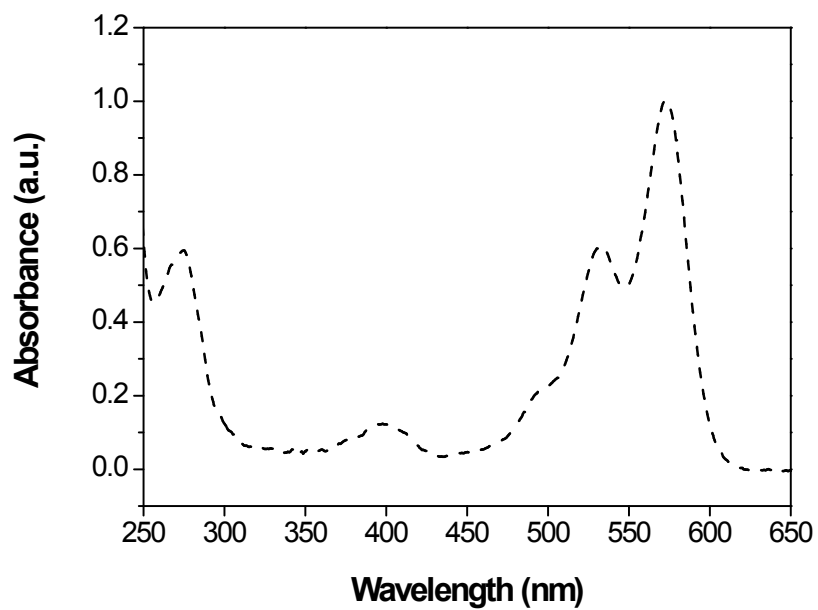

**Fig. S5** UV/Vis absorption spectrum of compound **8** in  $\text{CHCl}_3$  at room temperature.

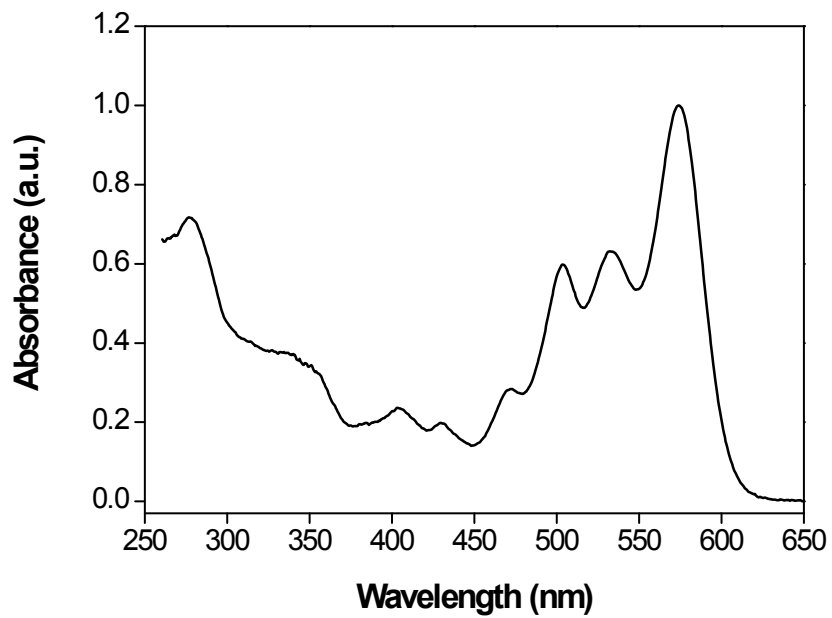

Supplement: c4ra03552f1.pdf [file c4ra03552f1.pdf]
